# Supplementary material for: Chondroitin 6-sulfate represses keratinocyte proliferation in mouse skin, which is associated with psoriasis
Source: PubMed Central journal article supplement (PMC7835381; doi:10.1038/s42003-020-01618-5), 2021-01-25
Supplement: 42003_2020_1618_MOESM2_ESM.pdf [file 42003_2020_1618_MOESM2_ESM.pdf]

# Supplementary Figure 1

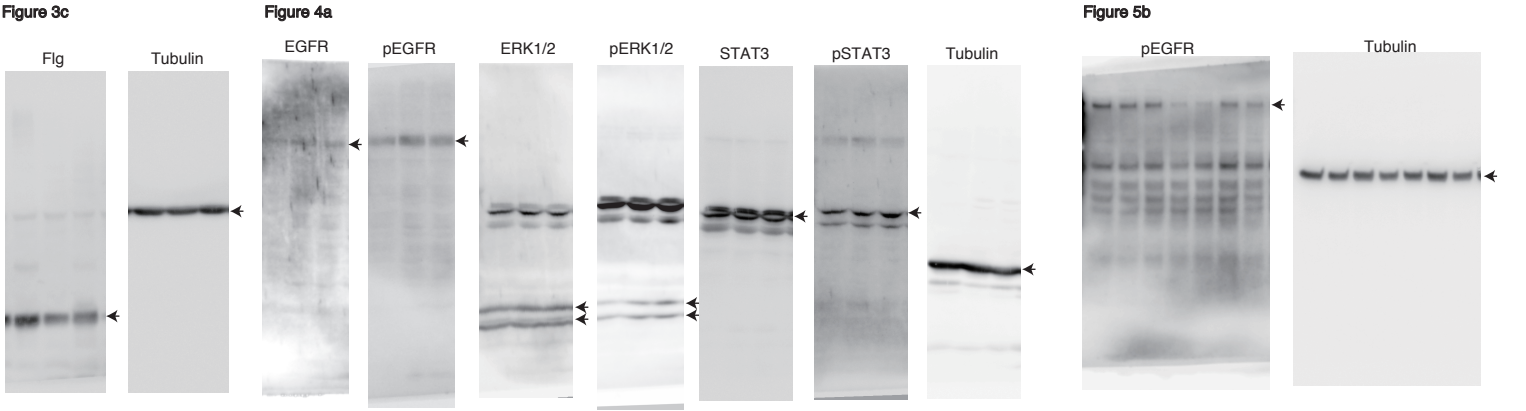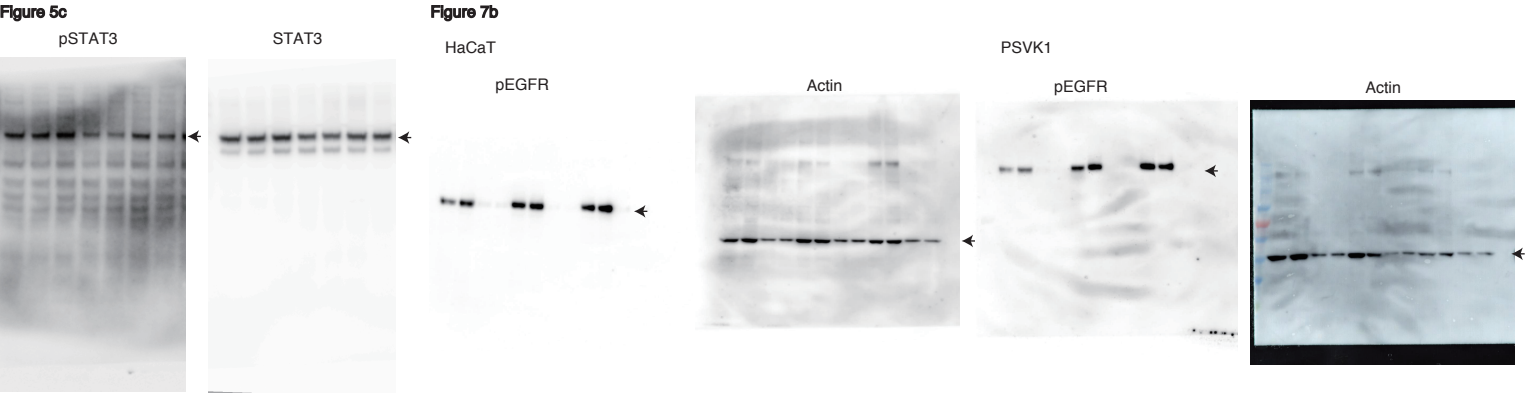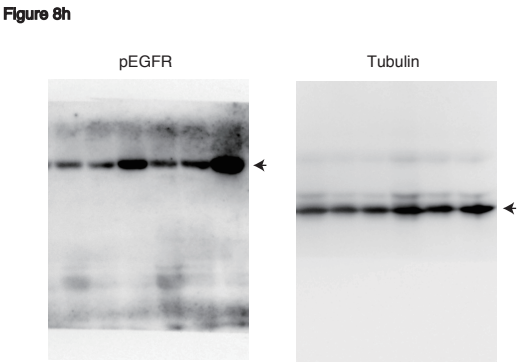

### Supplementary Table 1

#### Disaccharide composition of CS chains from skin of WT (*C6st-1<sup>+/+</sup>*), HET (*C6st-1<sup>+/-</sup>*), and KO (*C6st-1<sup>-/-</sup>*) newborn mice.

Values are expressed as a percent of total disaccharide units, and the means  $\pm$  s.d. of three determinations.

| CS-disaccharide unit         | CS-disaccharides (mol %) |                |                |
|------------------------------|--------------------------|----------------|----------------|
|                              | WT                       | HET            | KO             |
| $\Delta$ Di-0S <sup>a</sup>  | 22.6 $\pm$ 0.7           | 18.9 $\pm$ 4.9 | 21.0 $\pm$ 2.4 |
| $\Delta$ Di-6S               | 11.4 $\pm$ 3.7           | 4.2 $\pm$ 1.3  | ND             |
| $\Delta$ Di-4S               | 61.4 $\pm$ 4.4           | 71.6 $\pm$ 3.4 | 75.1 $\pm$ 1.9 |
| $\Delta$ Di-diS <sub>D</sub> | 1.0 $\pm$ 0.2            | ND             | ND             |
| $\Delta$ Di-diS <sub>E</sub> | 3.5 $\pm$ 1.1            | 5.3 $\pm$ 2.1  | 4.0 $\pm$ 3.0  |

<sup>a</sup>Abbreviations:

|                              |                                                                              |
|------------------------------|------------------------------------------------------------------------------|
| $\Delta$ Di-0S               | $\Delta$ HexA $\alpha$ 1-3GalNAc                                             |
| $\Delta$ Di-6S               | $\Delta$ HexA $\alpha$ 1-3GalNAc(6- <i>O</i> -Sulfate)                       |
| $\Delta$ Di-4S               | $\Delta$ HexA $\alpha$ 1-3GalNAc(4- <i>O</i> -Sulfate)                       |
| $\Delta$ Di-diS <sub>D</sub> | $\Delta$ HexA(2- <i>O</i> -Sulfate) $\alpha$ 1-3GalNAc(6- <i>O</i> -Sulfate) |
| $\Delta$ Di-diS <sub>E</sub> | $\Delta$ HexA $\alpha$ 1-3GalNAc(4-, 6- <i>O</i> -Sulfate)                   |

<sup>b</sup>ND, not detected.

## Supplementary Table 2

### Disaccharide composition of CS chains from primary mouse keratinocytes and two human keratinocyte cell lines, HaCaT and PSVK1.

Values are expressed as pmol of disaccharide per mg of dried homogenates of these cells, and the means  $\pm$  s.d. of three determinations.

|                              | Primary mouse keratinocytes        | HaCaT                   | PSVK1                 |
|------------------------------|------------------------------------|-------------------------|-----------------------|
|                              | CS disaccharides (pmol/mg) (mol %) |                         |                       |
| $\Delta$ Di-0S <sup>a</sup>  | 8.1 $\pm$ 2.4 (24.0)               | 5.1 $\pm$ 0.8 (1.9)     | 3.3 $\pm$ 2.4 (6.8)   |
| $\Delta$ Di-6S               | 2.4 $\pm$ 0.2 (7.1)                | 27.9 $\pm$ 3.9 (10.3)   | 11.5 $\pm$ 0.5 (23.9) |
| $\Delta$ Di-4S               | 20.1 $\pm$ 4.1 (59.5)              | 231.2 $\pm$ 42.2 (85.6) | 28.0 $\pm$ 9.7 (58.0) |
| $\Delta$ Di-diS <sub>D</sub> | 1.1 $\pm$ 0.2 (3.3)                | 2.4 $\pm$ 1.1 (0.9)     | 0.3 $\pm$ 0.1 (0.7)   |
| $\Delta$ Di-diS <sub>E</sub> | 2.1 $\pm$ 0.4 (6.1)                | 3.5 $\pm$ 4.1 (1.3)     | 5.1 $\pm$ 1.5 (10.6)  |
| $\Delta$ Di-triS             | ND <sup>b</sup>                    | ND                      | ND                    |
|                              | Total amount (pmol/mg)             |                         |                       |
|                              | 33.8 $\pm$ 7.0                     | 270.2 $\pm$ 50.4        | 48.3 $\pm$ 11.9       |

Values are expressed as pmol of disaccharide per mg of dried cell homogenates and as means  $\pm$  s.d. of three determinations.

<sup>a</sup>Abbreviations:  $\Delta$ Di-0S,  $\Delta$ HexA $\alpha$ 1-3GalNAc;  $\Delta$ Di-6S,  $\Delta$ HexA $\alpha$ 1-3GalNAc(6-*O*-Sulfate) ;  $\Delta$ Di-4S,  $\Delta$ HexA $\alpha$ 1-3GalNAc(4-*O*-Sulfate);  $\Delta$ Di-diS<sub>D</sub>,  $\Delta$ HexA(2-*O*-Sulfate) $\alpha$ 1-3GalNAc(6-*O*-Sulfate);  $\Delta$ Di-diS<sub>E</sub>,  $\Delta$ HexA $\alpha$ 1-3GalNAc(4-, 6-*O*-Sulfate));  $\Delta$ Di-triS,  $\Delta$ HexA(2-*O*-Sulfate) $\alpha$ 1-3GalNAc(4-, 6-*O*-Sulfate);

<sup>b</sup>ND, not detected.

### Supplementary Table 3

#### Primers used for real-time PCR

| Gene Name      | 5'-primer                       | 3'-primer                      |
|----------------|---------------------------------|--------------------------------|
| mAREG          | 5'-GGTCTTAGGCTCAGGCCATTA-3'     | 5'-CGCTTATGGTGGAAACCTCTC-3'    |
| mCLDN1         | 5'-TATCCCTTACAGATCGCTGGAC-3'    | 5'-CTGCCGATGAAAGCTGACACT-3'    |
| mCLDN5         | 5'-GCAAGGTGTATGAATCTGTGCT-3'    | 5'-GTCAAGGTAACAAAGAGTGCCA-3'   |
| mEGF           | 5'-AGCATCTCTCGGATTGACCCA-3'     | 5'-CCTGTCCCGTTAAGGAAAACCTCT-3' |
| mFAM20B        | 5'-GCCTTAAAATCTGCCATGGC-3'      | 5'-GGCATCCTGTCTTCCACCAG-3'     |
| mG3PDH         | 5'-CATCTGAGGGCCCACTG-3'         | 5'-GAGGCCATGTAGGCCATGA-3'      |
| mHB-EGF        | 5'-CGGGGAGTGCAGATACCTG-3'       | 5'-TTCTCCACTGGTAGAGTCAGC-3'    |
| mIL-1 $\beta$  | 5'-GATCCACACTCTCCAGCTGCA-3'     | 5'-GATCCACACTCTCCAGCTGCA-3'    |
| mIL-6          | 5'-TAGTCCTCCTACCCCAATTTCC-3'    | 5'-TTGGTCCTTAGCCACTCCTTC-3'    |
| mIL-17a        | 5'-CCACGTCACCCTGGACTCTC-3'      | 5'-CTCCGCATTGACACAGCG-3'       |
| mIL-23a        | 5'-ATGCTGGATTGCAGAGCAGTA-3'     | 5'-ACGGGGCACATTATTTTTAGTCT-3'  |
| mIvl           | 5'-GTCCCATCAACACACACTGC-3'      | 5'-CTCCTCATGTTTGGGAAAGC-3'     |
| mK10           | 5'-GCCTCCTACATGGACAAAGTC-3'     | 5'-GCTTCTCGTACCACTCCTTGA-3'    |
| mK14           | 5'-CAGTATCCGATCTTTCATGCG-3'     | 5'-GGGCTCACAGCCGGTTTCCTG-3'    |
| mLOR           | 5'-GCGGATCGTCCCAACAGTATC-3'     | 5'-TGAGAGGAGTAATAGCCCCCT-3'    |
| mOCLN          | 5'-TTGAAAGTCCACCTCCTTACAGA-3'   | 5'-CCGGATAAAAAGAGTACGCTGG-3'   |
| mTGF- $\alpha$ | 5'-CACTCTGGGTACGTGGGTG-3'       | 5'-CACAGGTGATAATGAGGACAGC-3'   |
| mTMG1          | 5'-TCTGGGCTCGTTGTTGTGG-3'       | 5'-AACCAGCATTCCCTCTCGGA-3'     |
| mTNF- $\alpha$ | 5'-CATCTTCTCAAAATTCGAGTGACAA-3' | 5'-TGGGAGTAGACAAGGTACAACCC-3'  |
