# Supplementary material for: Chondroitin 6-sulfate represses keratinocyte proliferation in mouse skin, which is associated with psoriasis
Source: PubMed Central journal article supplement (PMC7835381; doi:10.1038/s42003-020-01618-5), 2021-01-25
Supplement: 42003_2020_1618_MOESM3_ESM.pdf [file 42003_2020_1618_MOESM3_ESM.pdf]

## **Description of Additional Supplementary File**

**File name:** Supplementary Data 1

**Description:** Source data underlying the main figures.
